# Supplementary material for: A curcumin analogue GO‐Y030 depletes cancer stem cells by inhibiting the interaction between the HSP70/HSP40 complex and its substrates
Source: PubMed Central journal article supplement (PMC9989923; doi:10.1002/2211-5463.13550), 2023-01-24
Supplement: FEB4-13-434-s002.pdf [file FEB4-13-434-s002.pdf]

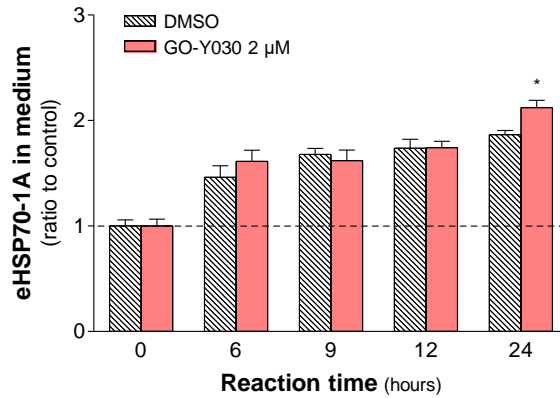

**Fig. S1.** Effect of GO-Y030 on release of extracellular HSP70-1A (eHSP70-1A) from PC3 cells. To detect eHSP70-1A in culture medium, an antibody-sandwich ELISA was performed. PC3 cells were incubated with or without GO-Y030 (2  $\mu$ M). After indicated time intervals, conditioned media were harvested and tested for the presence of eHSP70-1A by ELISA. The data are acquired as ratio to control group at 0 hour. Statistical significance was calculated using Student's t-test. The data represented as means  $\pm$  SEM of four independent experiments. \*P < 0.05 compared with control group at each corresponding time interval.
