# Supplementary material for: A curcumin analogue GO‐Y030 depletes cancer stem cells by inhibiting the interaction between the HSP70/HSP40 complex and its substrates
Source: PubMed Central journal article supplement (PMC9989923; doi:10.1002/2211-5463.13550), 2023-01-24
Supplement: FEB4-13-434-s003.pdf [file FEB4-13-434-s003.pdf]

**A**

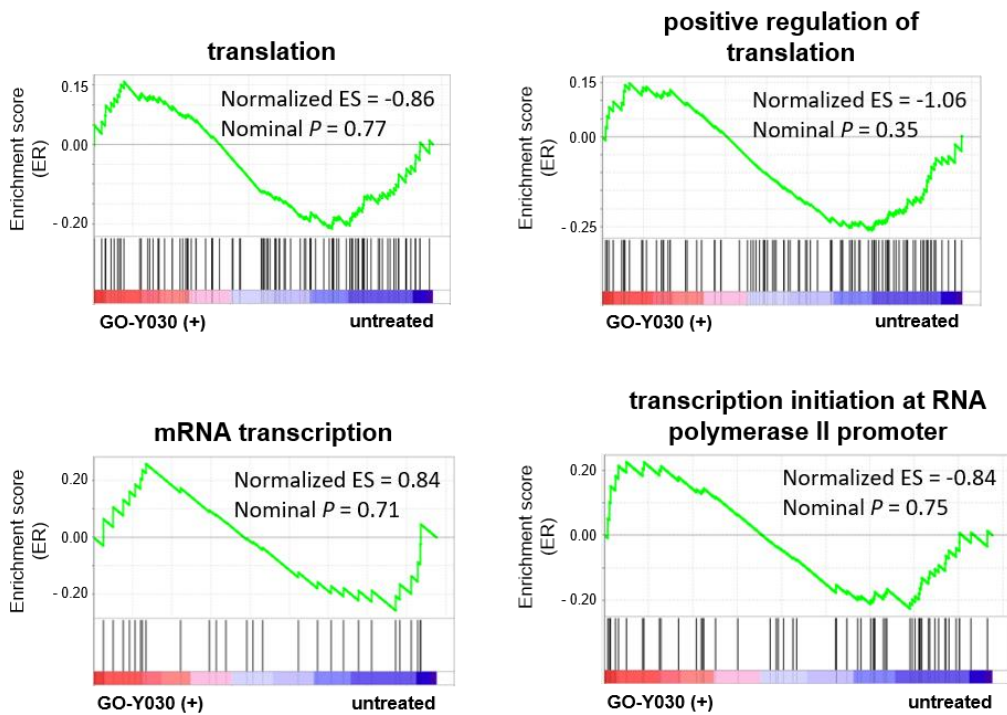

**B**

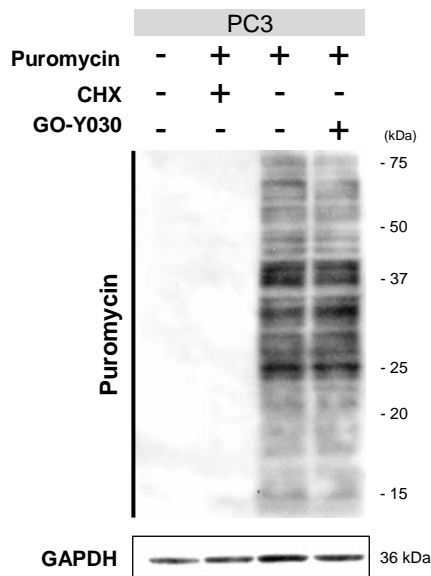

**Fig. S2.** Effects of GO-Y030 on global transcription and translation. **(A)** GSEA was performed to examine a global difference in mRNA expression profile of the indicated gene sets in PC3 cells. Note that GO-Y030 does not significantly alter the mRNA expression level of the genes involved in transcriptional and/or translational machinery. **(B)** Puromycin incorporation assay was performed to detect polypeptides in the elongation stage during protein synthesis in the presence or absence of GO-Y030 in PC3 cells. Note that GO-Y030 does not affect a global translation activity.
